# Supplementary material for: Mass Spectrometry-Based Flavor Monitoring of Peruvian Chocolate Fabrication Process
Source: PubMed Central journal article supplement (PMC7911988; doi:10.3390/metabo11020071), 2021-01-26

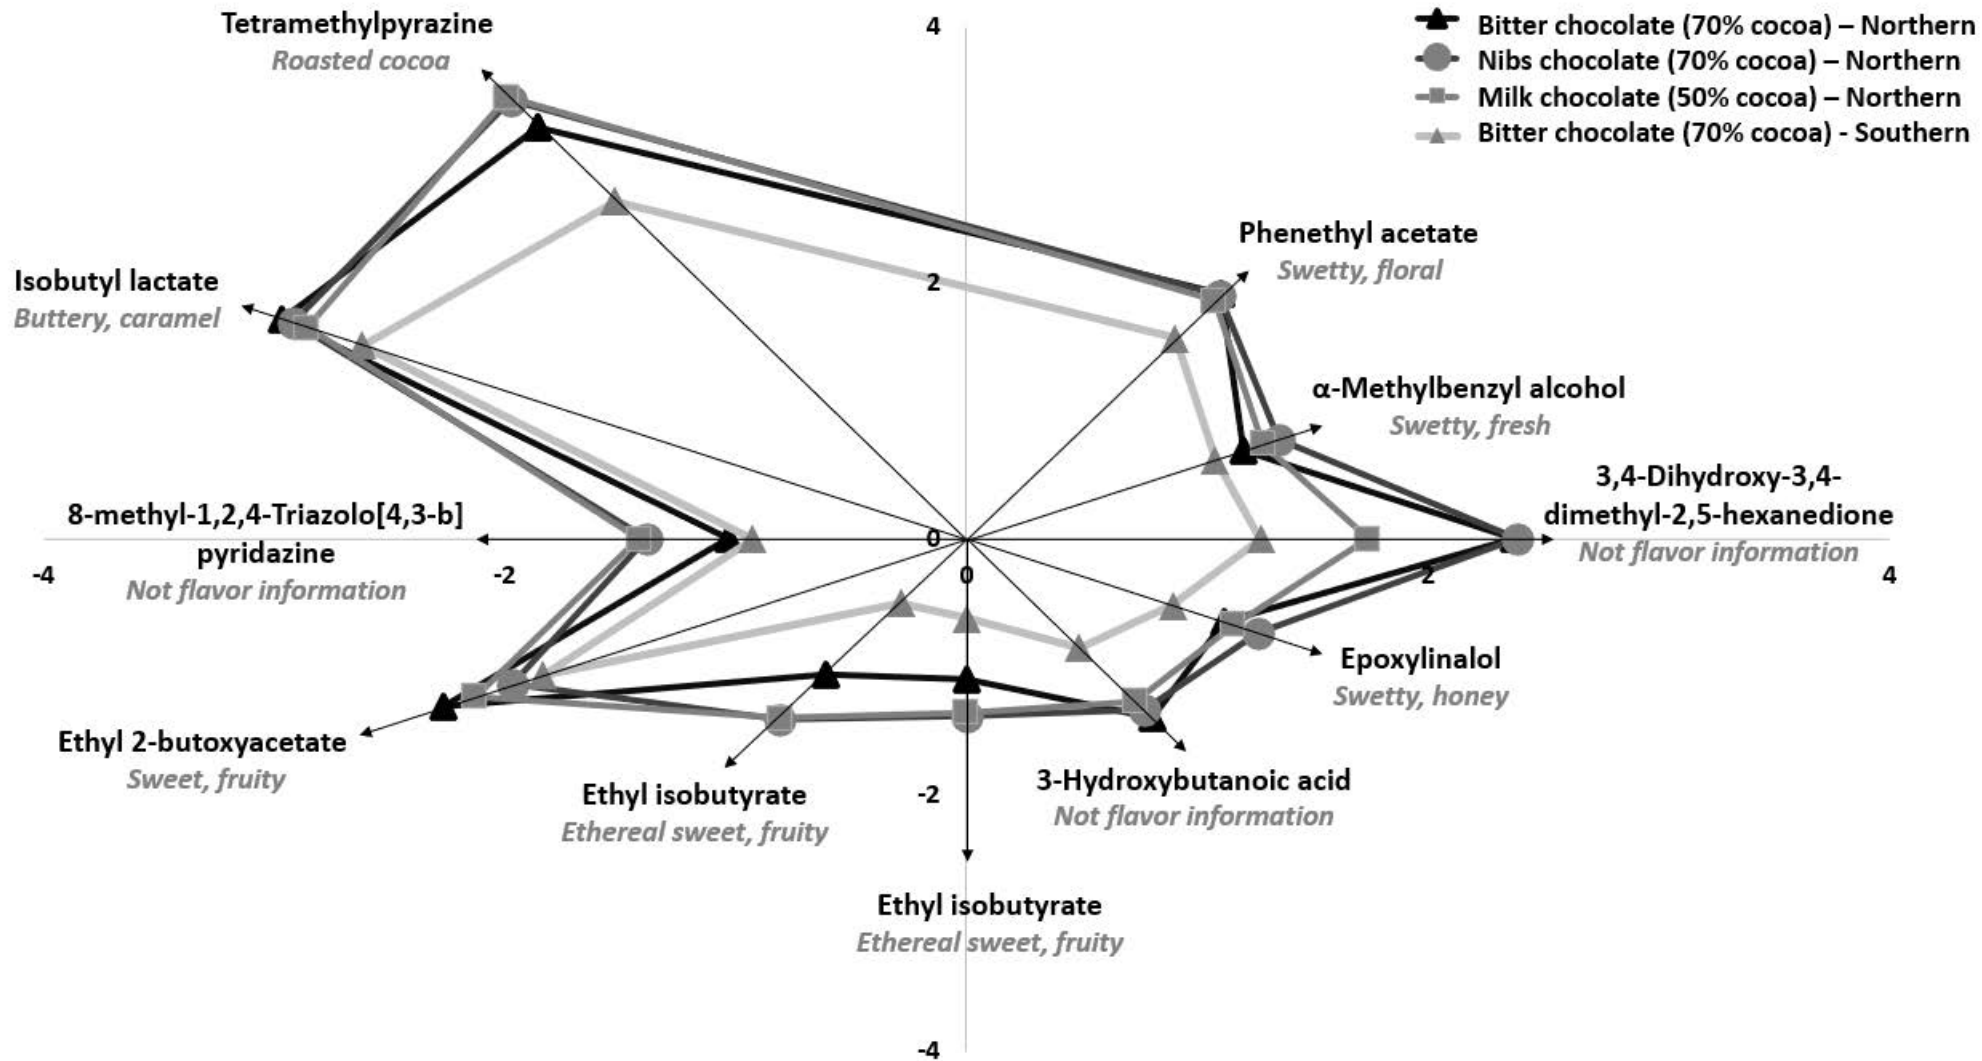

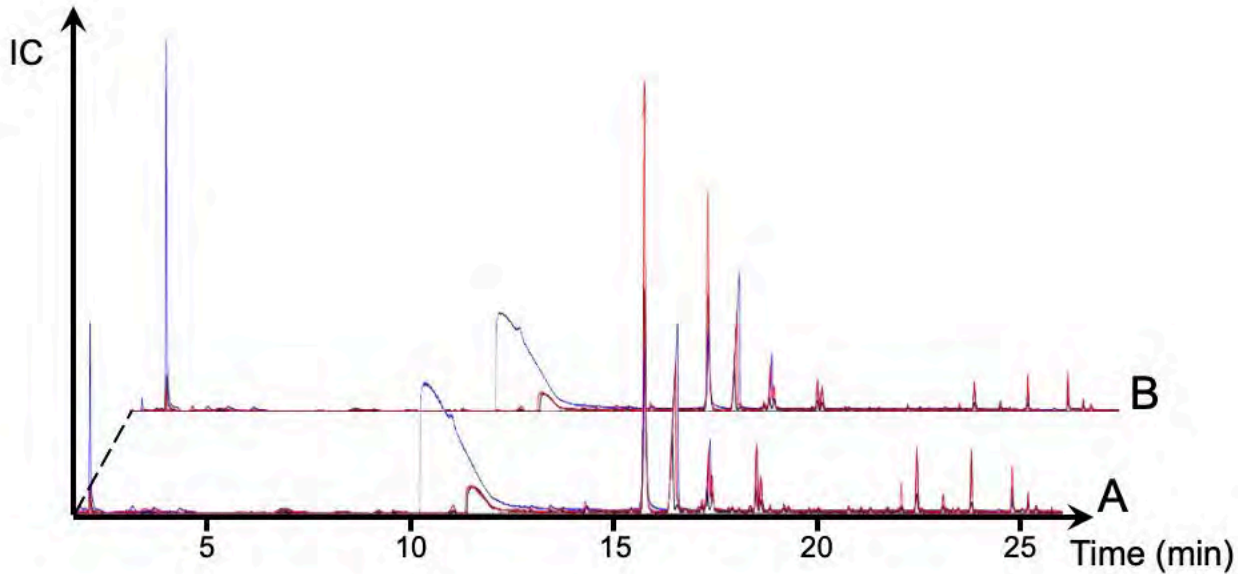

Supplement: metabolites-11-00071-s001.pdf [file metabolites-11-00071-s001.pdf]
